# Supplementary material for: Chemokine Assay Matrix Defines the Potency of Human Bone Marrow Mesenchymal Stromal Cells
Source: PubMed Central journal article supplement — Stem Cells Transl Med. 2022 Jul 26;11(9):971–86. doi: 10.1093/stcltm/szac050 (PMC9492268; doi:10.1093/stcltm/szac050), 2022-07-26
Supplement: szac050_suppl_supplementary_figures.pdf [file szac050_suppl_supplementary_figures.pdf]

Table S1. MSC's matrix chemokine responses to IFN $\gamma$ 

|        | IFN $\gamma$ (ng/ml) |               |                 |                   | Cumulative |
|--------|----------------------|---------------|-----------------|-------------------|------------|
|        | 0                    | 0.4           | 4               | 40                |            |
| CCL8   | 1.0                  | 2.2 $\pm$ 2.0 | 31.8 $\pm$ 43.6 | 93.3 $\pm$ 93.3   | 127.2      |
| CCL7   | 1.0                  | 1.3 $\pm$ 0.2 | 4.5 $\pm$ 2.1   | 110.3 $\pm$ 230.8 | 116.1      |
| CXCL11 | 1.0                  | 1.0 $\pm$ 0.4 | 14.2 $\pm$ 13.2 | 81.8 $\pm$ 91.2   | 97.0       |
| CXCL10 | 1.0                  | 1.2 $\pm$ 0.4 | 8.9 $\pm$ 7.1   | 52.7 $\pm$ 30.1   | 62.9       |
| CCL20  | 1.0                  | 1.2 $\pm$ 0.8 | 3.4 $\pm$ 4.7   | 4.6 $\pm$ 6.2     | 9.1        |
| CXCL9  | 1.0                  | 0.9 $\pm$ 0.8 | 1.9 $\pm$ 1.6   | 5.6 $\pm$ 7.3     | 8.4        |
| CXCL16 | 1.0                  | 1.4 $\pm$ 0.3 | 1.8 $\pm$ 0.4   | 2.0 $\pm$ 0.4     | 5.1        |
| CCL11  | 1.0                  | 1.3 $\pm$ 0.9 | 1.6 $\pm$ 1.2   | 2.3 $\pm$ 2.1     | 5.1        |
| CCL21  | 1.0                  | 1.1 $\pm$ 0.3 | 1.4 $\pm$ 0.4   | 1.9 $\pm$ 0.6     | 4.4        |
| CCL15  | 1.0                  | 1.0 $\pm$ 0.1 | 1.6 $\pm$ 1.2   | 1.6 $\pm$ 1.2     | 4.1        |
| CX3CL1 | 1.0                  | 1.2 $\pm$ 0.4 | 1.3 $\pm$ 0.6   | 1.6 $\pm$ 0.8     | 4.1        |
| CCL13  | 1.0                  | 1.0 $\pm$ 0.1 | 1.2 $\pm$ 0.1   | 1.7 $\pm$ 0.5     | 3.9        |
| CCL23  | 1.0                  | 1.1 $\pm$ 0.6 | 1.4 $\pm$ 1.0   | 1.3 $\pm$ 0.6     | 3.8        |
| CCL19  | 1.0                  | 1.2 $\pm$ 0.6 | 1.5 $\pm$ 2.2   | 0.8 $\pm$ 0.7     | 3.6        |
| CXCL14 | 1.0                  | 1.1 $\pm$ 0.6 | 1.0 $\pm$ 0.4   | 1.5 $\pm$ 0.6     | 3.5        |
| CCL25  | 1.0                  | 1.1 $\pm$ 0.3 | 1.0 $\pm$ 0.1   | 1.3 $\pm$ 0.7     | 3.5        |
| CCL28  | 1.0                  | 1.0 $\pm$ 0.1 | 1.0 $\pm$ 0.1   | 1.3 $\pm$ 0.5     | 3.4        |
| CCL4   | 2.0                  | 1.0 $\pm$ 0.1 | 1.0 $\pm$ 0.0   | 1.2 $\pm$ 0.1     | 4.4        |
| CCL26  | 1.0                  | 1.0 $\pm$ 0.3 | 1.1 $\pm$ 0.3   | 1.1 $\pm$ 0.3     | 3.2        |
| CCL18  | 1.0                  | 1.0 $\pm$ 0.2 | 1.0 $\pm$ 0.2   | 1.1 $\pm$ 0.4     | 3.2        |
| CXCL7  | 1.0                  | 1.0 $\pm$ 0.1 | 1.0 $\pm$ 0.1   | 1.0 $\pm$ 0.1     | 3.1        |
| CCL22  | 1.0                  | 1.0 $\pm$ 0.2 | 1.0 $\pm$ 0.2   | 1.1 $\pm$ 0.2     | 3.0        |
| CCL24  | 1.0                  | 1.0 $\pm$ 0.0 | 1.0 $\pm$ 0.1   | 1.0 $\pm$ 0.1     | 3.0        |
| CCL17  | 1.0                  | 1.0 $\pm$ 0.1 | 1.0 $\pm$ 0.1   | 1.1 $\pm$ 0.2     | 3.0        |
| CCL27  | 1.0                  | 1.0 $\pm$ 0.1 | 1.0 $\pm$ 0.0   | 1.0 $\pm$ 0.1     | 2.9        |
| CCL14  | 1.0                  | 1.0 $\pm$ 0.1 | 0.9 $\pm$ 0.0   | 0.9 $\pm$ 0.1     | 2.8        |
| CXCL2  | 1.0                  | 1.0 $\pm$ 0.1 | 0.9 $\pm$ 0.0   | 0.9 $\pm$ 0.1     | 2.8        |
| CCL1   | 1.0                  | 1.0 $\pm$ 0.4 | 0.8 $\pm$ 0.3   | 1.0 $\pm$ 0.4     | 2.7        |
| CCL5   | 1.0                  | 0.9 $\pm$ 0.1 | 0.9 $\pm$ 0.1   | 0.9 $\pm$ 0.1     | 2.7        |
| CXCL6  | 1.0                  | 0.9 $\pm$ 0.1 | 0.8 $\pm$ 0.1   | 0.8 $\pm$ 0.1     | 2.4        |
| CXCL1  | 1.0                  | 0.9 $\pm$ 0.1 | 0.8 $\pm$ 0.2   | 0.7 $\pm$ 0.2     | 2.4        |

Fold change in chemokine secretion over the 0 upon stimulation with the indicated concentrations of IFN $\gamma$  is shown. Cumulative fold change is calculated by the summation of fold changes observed in 0.4, 4, 40 ng/ml stimulation conditions.

Table S2. MSC's matrix chemokine responses to TNF $\alpha$ 

|               | TNF $\alpha$ (ng/ml) |               |               |                | Cumulative |
|---------------|----------------------|---------------|---------------|----------------|------------|
|               | 0                    | 0.4           | 4             | 40             |            |
| <b>CXCL1</b>  | 1.0                  | 2.2 $\pm$ 1.1 | 6.0 $\pm$ 2.4 | 12.4 $\pm$ 3.5 | 20.5       |
| <b>CCL20</b>  | 1.0                  | 2.3 $\pm$ 1.7 | 4.7 $\pm$ 3.6 | 9.6 $\pm$ 7.8  | 16.6       |
| <b>CXCL6</b>  | 1.0                  | 1.8 $\pm$ 1.0 | 4.2 $\pm$ 2.9 | 8.0 $\pm$ 5.8  | 14.0       |
| <b>CCL7</b>   | 1.0                  | 1.9 $\pm$ 1.2 | 2.9 $\pm$ 1.4 | 4.0 $\pm$ 1.6  | 8.8        |
| <b>CXCL10</b> | 1.0                  | 1.1 $\pm$ 0.2 | 1.4 $\pm$ 0.7 | 4.1 $\pm$ 3.3  | 6.6        |
| <b>CXCL14</b> | 1.0                  | 1.3 $\pm$ 0.5 | 2.0 $\pm$ 0.9 | 3.1 $\pm$ 1.6  | 6.4        |
| <b>CXCL9</b>  | 1.0                  | 1.8 $\pm$ 1.1 | 1.6 $\pm$ 1.4 | 1.9 $\pm$ 1.4  | 5.3        |
| <b>CCL19</b>  | 1.0                  | 2.4 $\pm$ 2.8 | 0.9 $\pm$ 0.3 | 1.6 $\pm$ 2.1  | 4.9        |
| <b>CCL8</b>   | 1.0                  | 1.1 $\pm$ 0.3 | 1.5 $\pm$ 0.5 | 1.9 $\pm$ 1.0  | 4.5        |
| <b>CXCL11</b> | 1.0                  | 1.1 $\pm$ 0.6 | 1.2 $\pm$ 0.6 | 2.2 $\pm$ 2.2  | 4.4        |
| <b>CCL11</b>  | 1.0                  | 1.3 $\pm$ 0.6 | 1.3 $\pm$ 0.9 | 1.7 $\pm$ 0.7  | 4.3        |
| <b>CX3CL1</b> | 1.0                  | 1.4 $\pm$ 0.8 | 1.2 $\pm$ 0.4 | 1.7 $\pm$ 0.9  | 4.2        |
| <b>CCL25</b>  | 1.0                  | 1.0 $\pm$ 0.1 | 1.2 $\pm$ 0.7 | 1.5 $\pm$ 0.9  | 3.7        |
| <b>CCL1</b>   | 1.0                  | 1.0 $\pm$ 0.6 | 1.1 $\pm$ 0.6 | 1.5 $\pm$ 0.4  | 3.6        |
| <b>CCL5</b>   | 1.0                  | 1.1 $\pm$ 0.2 | 1.1 $\pm$ 0.3 | 1.3 $\pm$ 0.5  | 3.6        |
| <b>CCL15</b>  | 1.0                  | 1.2 $\pm$ 1.0 | 1.0 $\pm$ 0.1 | 1.3 $\pm$ 0.9  | 3.4        |
| <b>CCL23</b>  | 1.0                  | 1.1 $\pm$ 0.3 | 1.1 $\pm$ 0.3 | 1.1 $\pm$ 0.2  | 3.3        |
| <b>CXCL2</b>  | 1.0                  | 1.0 $\pm$ 0.2 | 1.1 $\pm$ 0.2 | 1.2 $\pm$ 0.2  | 3.3        |
| <b>CXCL16</b> | 1.0                  | 1.0 $\pm$ 0.1 | 1.0 $\pm$ 0.0 | 1.1 $\pm$ 0.1  | 3.2        |
| <b>CCL4</b>   | 2.0                  | 1.0 $\pm$ 0.1 | 1.1 $\pm$ 0.1 | 1.1 $\pm$ 0.1  | 3.2        |
| <b>CCL21</b>  | 1.0                  | 1.0 $\pm$ 0.1 | 1.0 $\pm$ 0.2 | 1.1 $\pm$ 0.1  | 3.1        |
| <b>CCL24</b>  | 1.0                  | 1.0 $\pm$ 0.0 | 1.0 $\pm$ 0.1 | 1.0 $\pm$ 0.1  | 3.0        |
| <b>CXCL7</b>  | 1.0                  | 1.0 $\pm$ 0.0 | 1.0 $\pm$ 0.1 | 1.0 $\pm$ 0.1  | 3.0        |
| <b>CCL26</b>  | 1.0                  | 1.0 $\pm$ 0.4 | 1.0 $\pm$ 0.4 | 1.0 $\pm$ 0.4  | 3.0        |
| <b>CCL13</b>  | 1.0                  | 1.0 $\pm$ 0.1 | 1.0 $\pm$ 0.1 | 1.0 $\pm$ 0.1  | 3.0        |
| <b>CCL22</b>  | 1.0                  | 1.0 $\pm$ 0.2 | 0.9 $\pm$ 0.2 | 1.0 $\pm$ 0.2  | 3.0        |
| <b>CCL17</b>  | 1.0                  | 1.0 $\pm$ 0.2 | 1.0 $\pm$ 0.2 | 1.0 $\pm$ 0.2  | 2.9        |
| <b>CCL14</b>  | 1.0                  | 1.0 $\pm$ 0.1 | 1.0 $\pm$ 0.1 | 1.0 $\pm$ 0.1  | 2.9        |
| <b>CCL18</b>  | 1.0                  | 1.0 $\pm$ 0.2 | 0.9 $\pm$ 0.1 | 1.0 $\pm$ 0.2  | 2.9        |
| <b>CCL28</b>  | 1.0                  | 0.9 $\pm$ 0.4 | 0.9 $\pm$ 0.2 | 1.0 $\pm$ 0.1  | 2.9        |
| <b>CCL27</b>  | 1.0                  | 1.0 $\pm$ 0.1 | 0.9 $\pm$ 0.0 | 0.9 $\pm$ 0.1  | 2.8        |

Fold change in chemokine secretion over 0 upon stimulation with the indicated concentrations of TNF $\alpha$  is shown. Cumulative fold change is calculated by the summation of fold changes observed in 0.4, 4, 40 ng/ml stimulation conditions.

Table S3. MSC's matrix chemokine responses to IFN $\gamma$  + TNF $\alpha$

|        | IFN $\gamma$ + TNF $\alpha$ (ng/ml) |                |                   |                   | Cumulative |
|--------|-------------------------------------|----------------|-------------------|-------------------|------------|
|        | 0                                   | 0.4            | 4                 | 40                |            |
| CCL7   | 1.0                                 | 2.8 $\pm$ 0.6  | 137.1 $\pm$ 280.2 | 413.2 $\pm$ 620.9 | 553.0      |
| CXCL11 | 1.0                                 | 2.9 $\pm$ 2.1  | 136.4 $\pm$ 89.1  | 369.7 $\pm$ 174.9 | 509.1      |
| CCL8   | 1.0                                 | 4.8 $\pm$ 4.3  | 102.4 $\pm$ 81.1  | 167.8 $\pm$ 106.8 | 275.0      |
| CXCL10 | 1.0                                 | 11.2 $\pm$ 8.2 | 38.0 $\pm$ 18.9   | 38.2 $\pm$ 18.3   | 87.4       |
| CXCL9  | 1.0                                 | 1.4 $\pm$ 0.6  | 18.5 $\pm$ 20.6   | 66.5 $\pm$ 50.7   | 86.3       |
| CCL20  | 1.0                                 | 2.9 $\pm$ 1.8  | 9.6 $\pm$ 6.5     | 28.0 $\pm$ 18.3   | 40.5       |
| CXCL1  | 1.0                                 | 2.1 $\pm$ 1.1  | 4.2 $\pm$ 2.1     | 7.1 $\pm$ 2.7     | 13.3       |
| CX3CL1 | 1.0                                 | 1.5 $\pm$ 1.3  | 2.1 $\pm$ 1.1     | 3.4 $\pm$ 3.1     | 7.0        |
| CXCL16 | 1.0                                 | 1.5 $\pm$ 0.2  | 2.2 $\pm$ 0.5     | 2.9 $\pm$ 1.1     | 6.6        |
| CCL21  | 1.0                                 | 1.4 $\pm$ 0.3  | 2.4 $\pm$ 0.7     | 2.6 $\pm$ 0.8     | 6.4        |
| CXCL14 | 1.0                                 | 1.2 $\pm$ 0.3  | 1.9 $\pm$ 0.6     | 2.5 $\pm$ 1.1     | 5.6        |
| CXCL6  | 1.0                                 | 1.5 $\pm$ 0.8  | 2.0 $\pm$ 1.3     | 1.8 $\pm$ 0.9     | 5.3        |
| CCL11  | 1.0                                 | 1.1 $\pm$ 0.4  | 1.7 $\pm$ 0.6     | 2.1 $\pm$ 0.5     | 4.9        |
| CCL13  | 1.0                                 | 1.0 $\pm$ 0.1  | 1.5 $\pm$ 0.3     | 2.2 $\pm$ 0.8     | 4.7        |
| CCL19  | 1.0                                 | 1.5 $\pm$ 2.2  | 1.5 $\pm$ 2.2     | 1.7 $\pm$ 2.1     | 4.7        |
| CCL1   | 1.0                                 | 1.0 $\pm$ 0.4  | 1.3 $\pm$ 0.3     | 2.2 $\pm$ 1.3     | 4.4        |
| CCL5   | 1.0                                 | 1.2 $\pm$ 0.4  | 1.4 $\pm$ 0.5     | 1.8 $\pm$ 1.4     | 4.4        |
| CCL22  | 1.0                                 | 1.2 $\pm$ 0.4  | 1.5 $\pm$ 0.7     | 1.5 $\pm$ 0.8     | 4.2        |
| CCL25  | 1.0                                 | 1.2 $\pm$ 0.7  | 1.0 $\pm$ 0.0     | 1.9 $\pm$ 1.4     | 4.1        |
| CCL17  | 1.0                                 | 1.2 $\pm$ 0.3  | 1.2 $\pm$ 0.4     | 1.3 $\pm$ 0.5     | 3.7        |
| CCL4   | 1.0                                 | 1.0 $\pm$ 0.1  | 1.1 $\pm$ 0.2     | 1.2 $\pm$ 0.2     | 3.4        |
| CCL28  | 1.0                                 | 1.0 $\pm$ 0.1  | 1.2 $\pm$ 0.5     | 1.2 $\pm$ 0.3     | 3.3        |
| CXCL2  | 1.0                                 | 1.0 $\pm$ 0.0  | 1.1 $\pm$ 0.1     | 1.2 $\pm$ 0.1     | 3.3        |
| CCL24  | 1.0                                 | 1.0 $\pm$ 0.0  | 1.1 $\pm$ 0.1     | 1.2 $\pm$ 0.2     | 3.3        |
| CCL23  | 1.0                                 | 1.0 $\pm$ 0.2  | 1.0 $\pm$ 0.3     | 1.2 $\pm$ 0.4     | 3.1        |
| CXCL7  | 1.0                                 | 1.0 $\pm$ 0.1  | 1.0 $\pm$ 0.1     | 1.0 $\pm$ 0.1     | 3.1        |
| CCL26  | 1.0                                 | 1.0 $\pm$ 0.3  | 1.0 $\pm$ 0.6     | 1.1 $\pm$ 0.4     | 3.1        |
| CCL18  | 1.0                                 | 1.0 $\pm$ 0.1  | 1.0 $\pm$ 0.1     | 1.0 $\pm$ 0.2     | 3.0        |
| CCL15  | 1.0                                 | 0.9 $\pm$ 0.3  | 0.8 $\pm$ 0.3     | 1.1 $\pm$ 0.8     | 2.9        |
| CCL27  | 1.0                                 | 1.0 $\pm$ 0.1  | 1.0 $\pm$ 0.1     | 0.9 $\pm$ 0.1     | 2.9        |
| CCL14  | 1.0                                 | 1.0 $\pm$ 0.1  | 0.9 $\pm$ 0.1     | 0.9 $\pm$ 0.1     | 2.8        |

Fold change in chemokine secretion over 0 upon stimulation with the indicated concentrations of IFN $\gamma$ +TNF $\alpha$  is shown. Cumulative fold change is calculated by the summation of fold changes observed in 0.4, 4, 40 ng/ml stimulation conditions.

Table S4. MSC's matrix chemokine responses to IL-10

|               | IL-10 (ng/ml) |         |         |         | Cumulative |
|---------------|---------------|---------|---------|---------|------------|
|               | 0             | 0.4     | 4       | 40      |            |
| <b>CXCL11</b> | 1.0           | 1.5±0.2 | 1.4±0.3 | 2.5±2.1 | 5.4        |
| <b>CCL11</b>  | 1.0           | 1.1±0.4 | 1.6±0.3 | 2.2±1.7 | 4.9        |
| <b>CXCL9</b>  | 1.0           | 1.4±1.3 | 2.2±1.0 | 0.8±0.4 | 4.4        |
| <b>CCL5</b>   | 1.0           | 1.2±0.6 | 1.6±0.6 | 1.3±0.7 | 4.1        |
| <b>CCL8</b>   | 1.0           | 1.1±0.4 | 1.5±0.5 | 1.3±0.7 | 4.0        |
| <b>CCL23</b>  | 1.0           | 1.7±2.0 | 1.0±0.6 | 1.1±0.4 | 3.8        |
| <b>CCL17</b>  | 1.0           | 1.2±0.1 | 1.1±0.3 | 1.4±0.4 | 3.6        |
| <b>CXCL14</b> | 1.0           | 0.8±0.3 | 1.4±0.8 | 1.3±0.5 | 3.6        |
| <b>CX3CL1</b> | 1.0           | 0.7±0.2 | 1.7±1.1 | 1.2±0.5 | 3.5        |
| <b>CCL3</b>   | 1.0           | 1.1±0.2 | 1.4±0.3 | 1.1±0.1 | 3.5        |
| <b>CCL13</b>  | 1.0           | 1.1±0.1 | 1.2±0.0 | 1.2±0.0 | 3.5        |
| <b>CCL22</b>  | 1.0           | 1.2±0.3 | 0.9±0.2 | 1.3±0.6 | 3.5        |
| <b>CCL1</b>   | 1.0           | 0.8±0.3 | 1.4±0.7 | 1.2±0.9 | 3.4        |
| <b>CCL27</b>  | 1.0           | 1.1±0.1 | 1.1±0.1 | 1.2±0.1 | 3.4        |
| <b>CCL24</b>  | 1.0           | 1.1±0.1 | 1.1±0.0 | 1.1±0.0 | 3.3        |
| <b>CCL7</b>   | 1.0           | 1.1±0.1 | 1.2±0.2 | 1.0±0.1 | 3.3        |
| <b>CCL26</b>  | 1.0           | 1.2±0.5 | 0.9±0.3 | 1.2±0.4 | 3.3        |
| <b>CXCL10</b> | 1.0           | 1.1±0.1 | 1.1±0.1 | 1.1±0.0 | 3.3        |
| <b>CXCL2</b>  | 1.0           | 1.0±0.0 | 1.1±0.0 | 1.1±0.0 | 3.2        |
| <b>CXCL1</b>  | 1.0           | 1.1±0.1 | 1.1±0.2 | 1.0±0.1 | 3.2        |
| <b>CXCL6</b>  | 1.0           | 1.0±0.1 | 1.1±0.0 | 1.0±0.1 | 3.2        |
| <b>CCL14</b>  | 1.0           | 1.0±0.1 | 1.1±0.1 | 1.0±0.1 | 3.1        |
| <b>CCL18</b>  | 1.0           | 1.0±0.1 | 1.0±0.1 | 1.1±0.0 | 3.1        |
| <b>CCL20</b>  | 1.0           | 0.9±0.2 | 0.9±0.3 | 1.3±0.9 | 3.1        |
| <b>CXCL7</b>  | 1.0           | 1.0±0.0 | 1.0±0.0 | 1.0±0.1 | 3.0        |
| <b>CCL28</b>  | 1.0           | 1.0±0.0 | 1.0±0.0 | 1.0±0.1 | 3.0        |
| <b>CCL15</b>  | 1.0           | 1.0±0.0 | 1.0±0.0 | 1.0±0.0 | 3.0        |
| <b>CXCL16</b> | 1.0           | 1.0±0.0 | 1.0±0.0 | 1.0±0.0 | 2.9        |
| <b>CCL21</b>  | 1.0           | 1.0±0.2 | 1.1±0.4 | 0.9±0.2 | 2.9        |
| <b>CCL25</b>  | 1.0           | 0.5±0.4 | 0.8±0.4 | 0.8±0.3 | 2.1        |
| <b>CCL19</b>  | 1.0           | 0.4±0.5 | 1.2±1.9 | 0.4±0.5 | 2.1        |

Fold change in chemokine secretion over 0 upon stimulation with the indicated concentrations of IL-10 is shown. Cumulative fold change is calculated by the summation of fold changes observed in 0.4, 4, 40 ng/ml stimulation conditions. n=3 donors

Table S5. MSC's matrix chemokine responses to TGFβ

|        | TGFβ (ng/ml) |         |         |         | Cumulative |
|--------|--------------|---------|---------|---------|------------|
|        | 0            | 0.4     | 4       | 40      |            |
| CCL7   | 1.0          | 2.9±0.7 | 3.1±0.6 | 2.9±0.2 | 8.9        |
| CXCL6  | 1.0          | 2.5±2.6 | 2.4±2.6 | 2.5±2.6 | 7.4        |
| CCL28  | 1.0          | 1.6±0.5 | 1.6±0.5 | 1.5±0.5 | 4.8        |
| CX3CL1 | 1.0          | 1.3±0.5 | 1.8±1.1 | 1.4±0.3 | 4.5        |
| CCL19  | 1.0          | 1.2±1.9 | 2.5±4.1 | 0.4±0.5 | 4.2        |
| CXCL11 | 1.0          | 1.6±1.4 | 1.6±1.4 | 0.8±0.2 | 3.9        |
| CCL26  | 1.0          | 1.2±0.8 | 1.6±1.0 | 1.2±0.5 | 3.9        |
| CCL22  | 1.0          | 1.0±0.3 | 1.0±0.4 | 1.8±0.3 | 3.8        |
| CCL23  | 1.0          | 1.6±1.0 | 0.8±0.3 | 1.1±0.4 | 3.5        |
| CCL8   | 1.0          | 1.0±0.2 | 1.1±0.1 | 1.4±1.0 | 3.5        |
| CCL27  | 1.0          | 1.1±0.0 | 1.1±0.1 | 1.3±0.0 | 3.5        |
| CCL1   | 1.0          | 1.8±0.7 | 0.8±0.3 | 0.8±0.3 | 3.4        |
| CXCL14 | 1.0          | 0.9±0.5 | 1.2±0.3 | 1.3±1.4 | 3.4        |
| CXCL16 | 1.0          | 1.0±0.1 | 1.1±0.1 | 1.2±0.1 | 3.3        |
| CCL18  | 1.0          | 1.1±0.1 | 1.1±0.1 | 1.1±0.1 | 3.3        |
| CCL17  | 1.0          | 1.2±0.7 | 1.1±0.2 | 1.0±0.2 | 3.3        |
| CCL13  | 1.0          | 1.1±0.1 | 1.1±0.1 | 1.1±0.0 | 3.2        |
| CXCL10 | 1.0          | 1.1±0.1 | 1.0±0.0 | 1.1±0.1 | 3.2        |
| CCL21  | 1.0          | 1.0±0.2 | 1.2±0.2 | 1.0±0.4 | 3.1        |
| CCL24  | 1.0          | 1.0±0.0 | 1.0±0.1 | 1.1±0.0 | 3.1        |
| CXCL2  | 1.0          | 1.0±0.0 | 1.0±0.1 | 1.1±0.1 | 3.1        |
| CCL15  | 1.0          | 1.0±0.0 | 1.0±0.0 | 1.0±0.0 | 3.0        |
| CXCL7  | 1.0          | 1.0±0.0 | 1.0±0.1 | 1.0±0.1 | 3.0        |
| CCL14  | 1.0          | 1.0±0.1 | 0.9±0.0 | 1.0±0.0 | 2.9        |
| CCL5   | 1.0          | 1.0±0.1 | 0.9±0.1 | 0.9±0.3 | 2.9        |
| CXCL1  | 1.0          | 1.0±0.2 | 1.0±0.1 | 0.9±0.1 | 2.9        |
| CCL25  | 1.0          | 0.8±0.4 | 1.0±0.0 | 1.0±0.0 | 2.8        |
| CCL3   | 1.0          | 0.9±0.1 | 0.8±0.0 | 1.0±0.1 | 2.7        |
| CXCL9  | 1.0          | 0.8±0.4 | 0.8±0.4 | 1.1±0.9 | 2.7        |
| CCL20  | 1.0          | 0.8±0.3 | 0.8±0.3 | 0.7±0.2 | 2.2        |
| CCL11  | 1.0          | 0.6±0.4 | 0.6±0.4 | 0.5±0.4 | 1.8        |

Fold change in chemokine secretion over 0 upon stimulation with the indicated concentrations of TGFβ is shown. Cumulative fold change is calculated by the summation of fold changes observed in 0.4, 4, 40 ng/ml stimulation conditions. n=3 donors

Table S6. MSC's matrix chemokine responses to IL10+ TGFβ

|               | IL-10+TGFβ (ng/ml) |         |         |          | Cumulative |
|---------------|--------------------|---------|---------|----------|------------|
|               | 0                  | 0.4     | 4       | 40       |            |
| <b>CCL19</b>  | 1.0                | 0.8±0.3 | 0.8±0.3 | 7.9±12.4 | 9.5        |
| <b>CXCL11</b> | 1.0                | 3.0±2.0 | 3.0±2.0 | 2.9±2.2  | 9.0        |
| <b>CCL7</b>   | 1.0                | 2.2±0.9 | 2.2±0.9 | 2.5±0.9  | 7.0        |
| <b>CCL8</b>   | 1.0                | 1.4±0.6 | 1.4±0.6 | 2.3±2.1  | 5.0        |
| <b>CCL23</b>  | 1.0                | 1.8±1.9 | 1.8±1.9 | 0.8±0.5  | 4.4        |
| <b>CCL21</b>  | 1.0                | 1.3±0.5 | 1.3±0.5 | 1.3±0.6  | 3.9        |
| <b>CCL26</b>  | 1.0                | 1.2±0.4 | 1.2±0.4 | 1.2±0.7  | 3.6        |
| <b>CXCL10</b> | 1.0                | 1.1±0.2 | 1.1±0.2 | 1.3±0.4  | 3.5        |
| <b>CCL5</b>   | 1.0                | 1.3±0.2 | 1.3±0.2 | 1.0±0.3  | 3.5        |
| <b>CCL22</b>  | 1.0                | 1.1±0.4 | 1.1±0.4 | 1.2±0.2  | 3.4        |
| <b>CCL13</b>  | 1.0                | 1.1±0.1 | 1.1±0.1 | 1.1±0.1  | 3.4        |
| <b>CX3CL1</b> | 1.0                | 1.2±0.2 | 1.2±0.2 | 1.0±0.3  | 3.4        |
| <b>CXCL16</b> | 1.0                | 1.1±0.0 | 1.1±0.0 | 1.1±0.1  | 3.3        |
| <b>CCL1</b>   | 1.0                | 1.0±0.0 | 1.0±0.0 | 1.4±0.7  | 3.3        |
| <b>CCL27</b>  | 1.0                | 1.0±0.2 | 1.0±0.2 | 1.2±0.1  | 3.3        |
| <b>CCL17</b>  | 1.0                | 1.2±0.6 | 1.2±0.6 | 0.9±0.2  | 3.3        |
| <b>CCL3</b>   | 1.0                | 1.0±0.1 | 1.0±0.1 | 1.1±0.2  | 3.2        |
| <b>CCL24</b>  | 1.0                | 1.0±0.1 | 1.0±0.1 | 1.1±0.1  | 3.1        |
| <b>CXCL2</b>  | 1.0                | 1.0±0.1 | 1.0±0.1 | 1.0±0.0  | 3.1        |
| <b>CCL18</b>  | 1.0                | 1.0±0.1 | 1.0±0.1 | 1.0±0.1  | 3.0        |
| <b>CXCL9</b>  | 1.0                | 1.1±0.8 | 1.1±0.8 | 0.8±0.4  | 3.0        |
| <b>CXCL7</b>  | 1.0                | 1.0±0.0 | 1.0±0.0 | 1.0±0.0  | 3.0        |
| <b>CCL15</b>  | 1.0                | 1.0±0.0 | 1.0±0.0 | 1.0±0.0  | 3.0        |
| <b>CCL20</b>  | 1.0                | 1.0±0.3 | 1.0±0.3 | 0.9±0.2  | 2.9        |
| <b>CCL14</b>  | 1.0                | 1.0±0.1 | 1.0±0.1 | 1.0±0.0  | 2.9        |
| <b>CXCL14</b> | 1.0                | 1.0±0.8 | 1.0±0.8 | 0.7±0.3  | 2.8        |
| <b>CXCL1</b>  | 1.0                | 0.9±0.1 | 0.9±0.1 | 0.8±0.1  | 2.6        |
| <b>CCL28</b>  | 1.0                | 0.8±0.3 | 0.8±0.3 | 0.9±0.1  | 2.5        |
| <b>CXCL6</b>  | 1.0                | 0.8±0.1 | 0.8±0.1 | 0.8±0.1  | 2.4        |
| <b>CCL11</b>  | 1.0                | 0.7±0.3 | 0.7±0.3 | 0.5±0.2  | 1.9        |
| <b>CCL25</b>  | 1.0                | 0.5±0.4 | 0.5±0.4 | 0.5±0.4  | 1.6        |

Fold change in chemokine secretion over 0 upon stimulation with the indicated concentrations of IL10+TGFβ is shown. Cumulative fold change is calculated by the summation of fold changes observed in 0.4, 4, 40 ng/ml stimulation conditions. n=3 donors

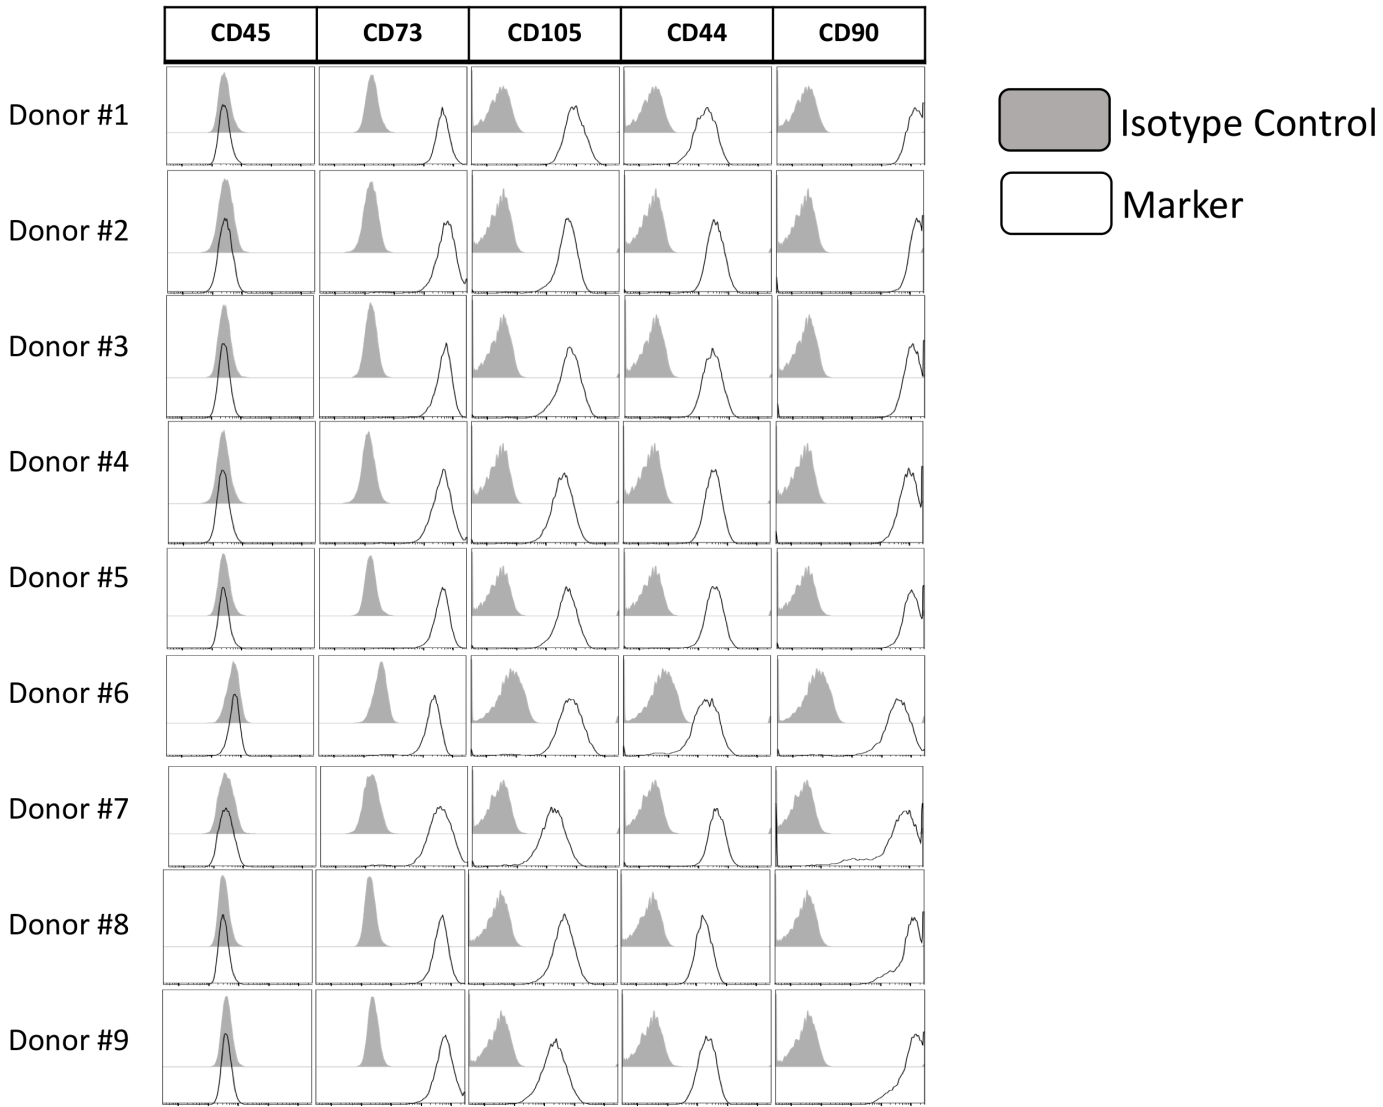

**Figure S1:** Identity of human bone marrow derived Mesenchymal Stromal Cells. Histogram plots are shown with appropriate isotype controls and marker expression

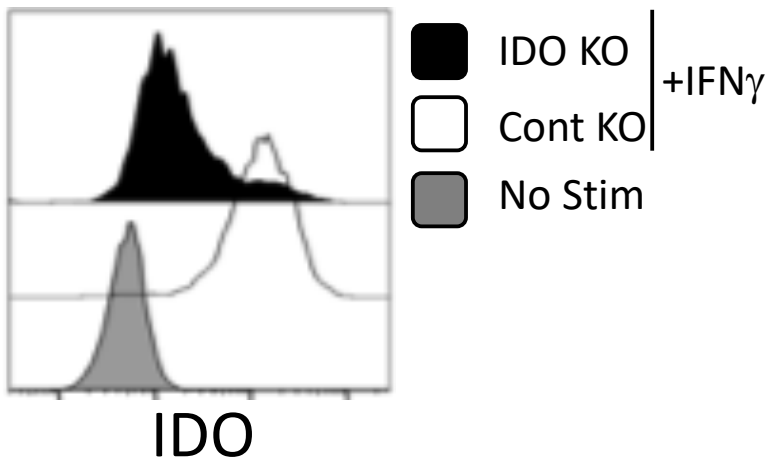

**Figure S2:** Knock down efficiency of IDO expression in human bone marrow derived Mesenchymal stromal cells transfected with control or IDO siRNA. Intracellular IDO protein levels were measured using flowcytometry.



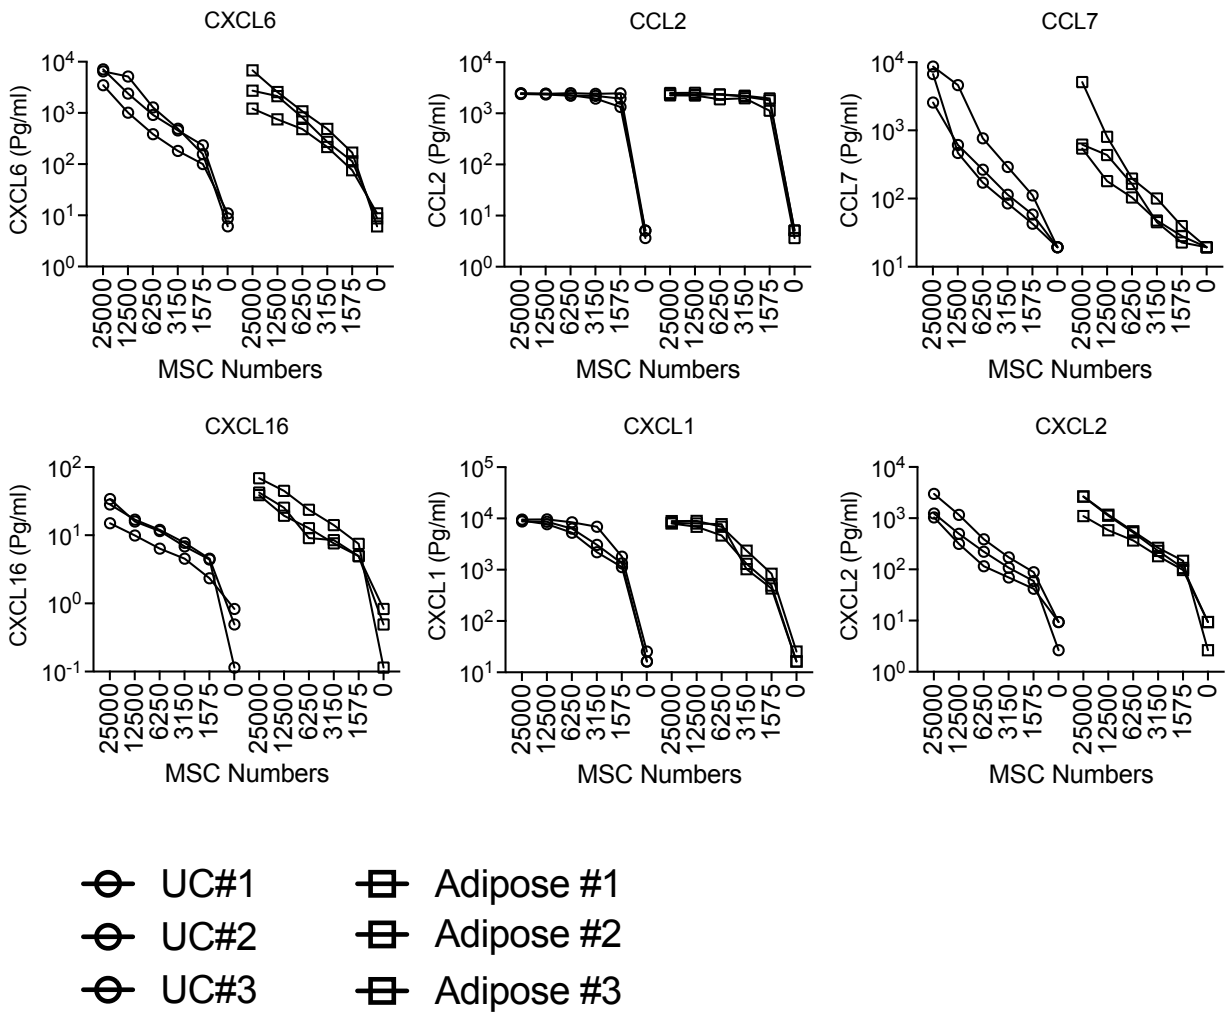

**Figure S3:** Innate chemokine expression of human Umbilical Cord (UC) or Adipose tissue derived MSCs (n=3 donors). Supernatants of adipose or umbilical Cord (UC) MSCs were investigated for CXCL6, CCL2, CCL7, CXCL16, CXCL1, CXCL2. Secretion levels of these chemokines at different MSC density are shown.

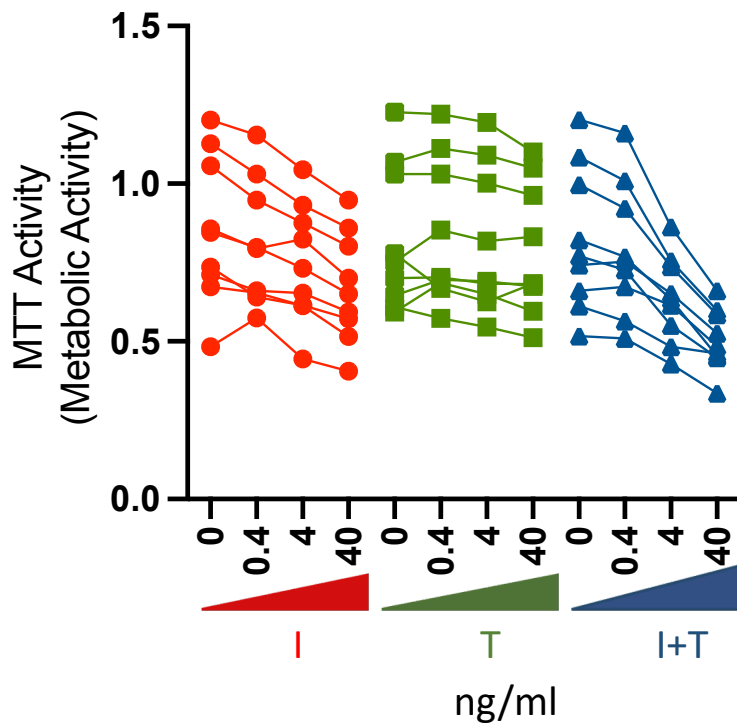

**Figure S4:** MTT analysis of human bone marrow derived MSCs stimulated with  $\text{IFN}\gamma$  and/or  $\text{TNF}\alpha$  for 48 hours.

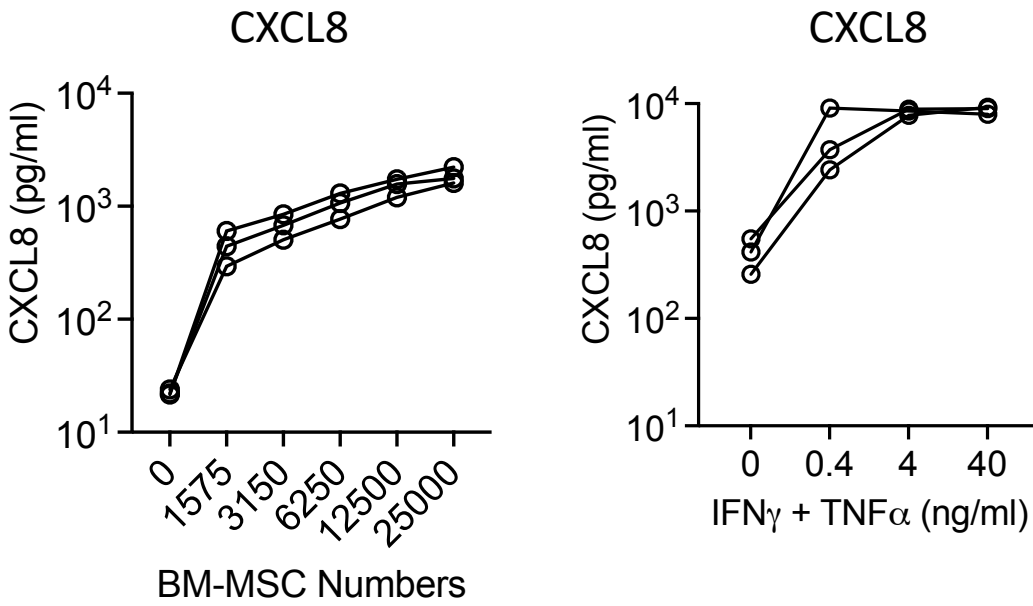

**Figure S5:** Expression and regulation of CXCL8 in human bone marrow derived MSCs. A. Supernatants of human bone marrow derived MSCs (N=3 donors) were investigated for CXCL8. Secretion levels at different MSC density are shown. (B) CXCL8 secretion from IFN $\gamma$  and TNF $\alpha$  stimulated human bone marrow derived MSCs is shown
